# Supplementary material
Source: Springer Nature journal article supplement (https://www.springermedizin.de/resource/supplementary/13063_2013_1938_MOESM3_ESM.pdf/9621954)
Supplement: MOESM3 [file 9621954]

United Kingdom RECs  
List from NRES: N = 119  
Additional from OHRP: N = 36

Excluded:  
- Multiple at one institution: 2  
- Pilot site: 1

Stratum 1: OHRP list  
N = 34

Stratum 2: NRES list  
N = 118

Surveyed  
n = 34

Surveyed  
n = 118

Excluded:  
- Ineligible: 13  
- Undeliverable: 0

Excluded:  
- Ineligible: 15  
- Undeliverable: 1

**Response rate: 6/21 = 28.6%**  
- Declined: 4  
- No response: 11  
- Respondents: 6

**Response rate: 37/102 = 36.3%**  
- Declined: 5  
- No response: 60  
- Respondents: 37
